# Supplementary material for: A software tool for the input and management of phenotypic data using personal digital assistants and other mobile devices
Source: PubMed Central journal article supplement (PMC4393613; doi:10.1186/s13007-015-0069-3), 2015-04-07
Supplement: 13007_2015_69_MOESM1_ESM.pdf [file 13007_2015_69_MOESM1_ESM.pdf]

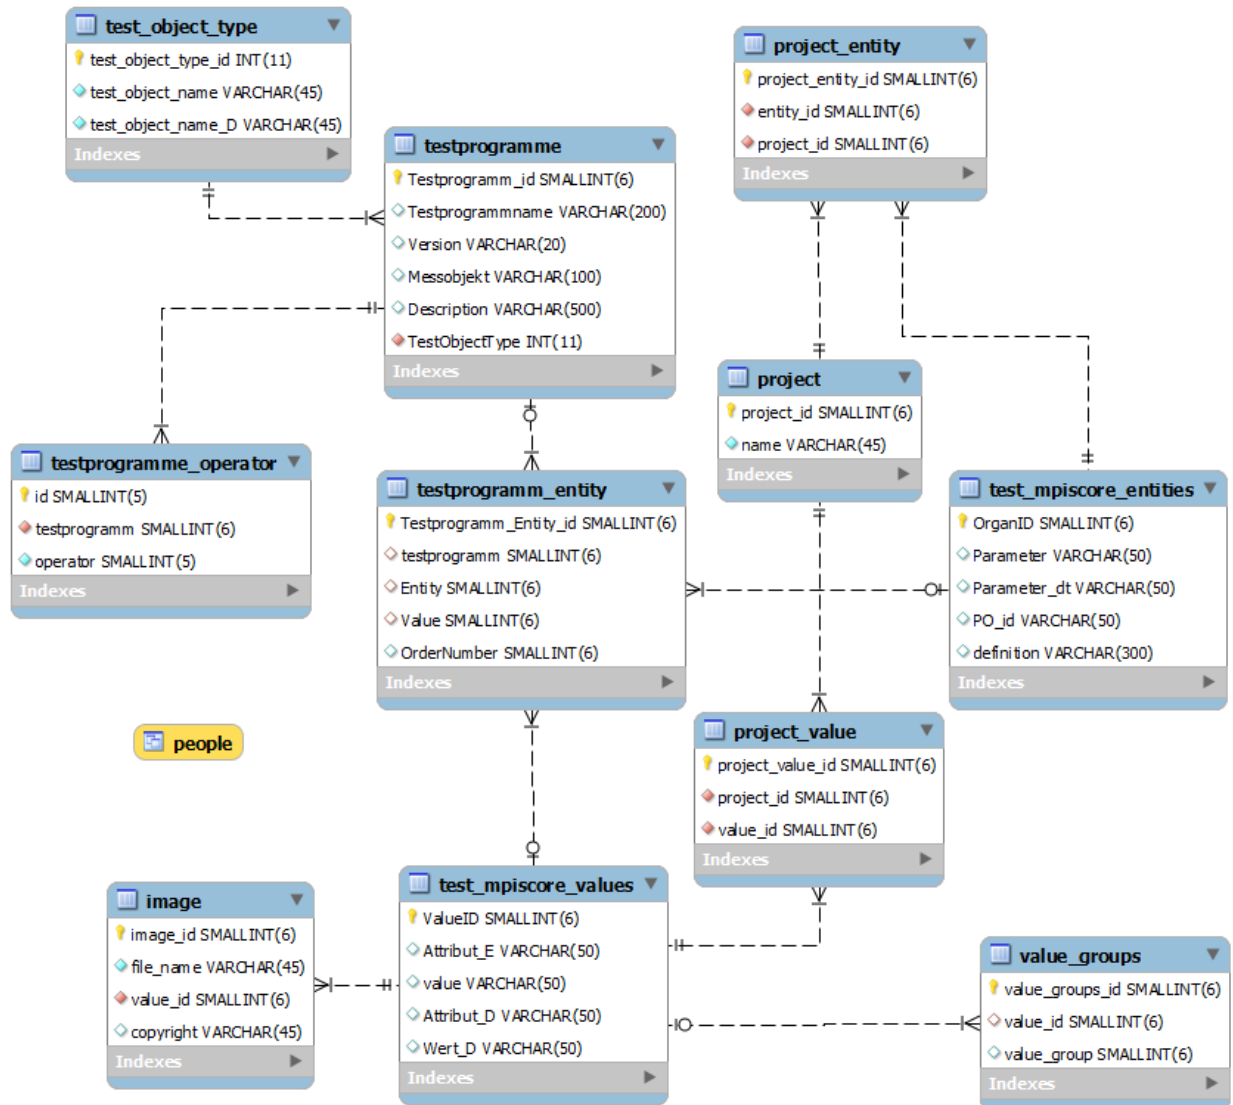

Figure S1. Entity-relationship diagram of the scheme database

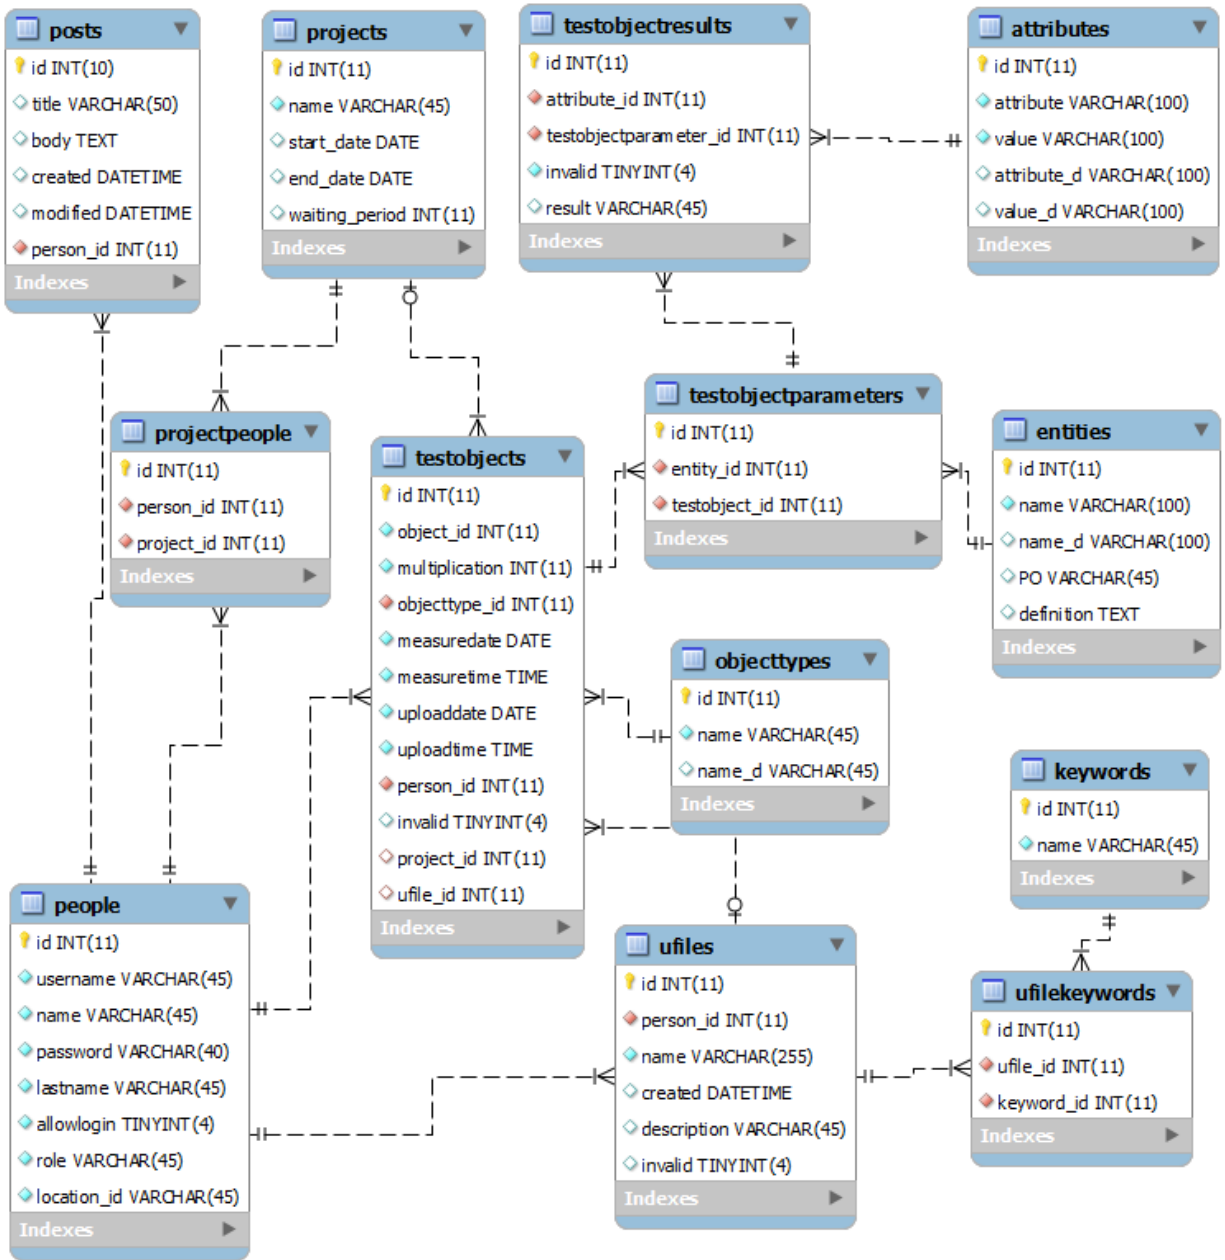

Figure S2. Entity-relationship diagram of the result database
