# Supplementary material for: A software tool for the input and management of phenotypic data using personal digital assistants and other mobile devices
Source: PubMed Central journal article supplement (PMC4393613; doi:10.1186/s13007-015-0069-3), 2015-04-07
Supplement: 13007_2015_69_MOESM2_ESM.pdf [file 13007_2015_69_MOESM2_ESM.pdf]

**Table A1: CSV format, entity-attribute value format**

| Object | Multiplication | Measure-date | Entity    | Attribute         | Value                                     | Result       |
|--------|----------------|--------------|-----------|-------------------|-------------------------------------------|--------------|
| 44     | 1              | 02.01.2015   | Treatment | Sowing            |                                           |              |
| 44     | 1              | 02.01.2015   | Plant     | Species           | Os                                        |              |
| 44     | 1              | 02.01.2015   | Plant     | Subspecies        | IR64                                      |              |
| 44     | 1              | 14.01.2015   | Design    | Row               |                                           | 3            |
| 44     | 1              | 14.01.2015   | Design    | Column            |                                           | 1            |
| 44     | 1              | 14.01.2015   | Treatment | Planting          |                                           |              |
| 44     | 1              | 14.01.2015   | Treatment | Location          | name                                      | Phytotron 44 |
| 44     | 1              | 21.01.2015   | Treatment | treatment         | 50 mM NaCl                                |              |
| 44     | 1              | 21.01.2015   | Shoot     | absolute length   | cm                                        | 10           |
| 44     | 1              | 21.01.2015   | Shoot     | drought score     | no symptoms                               | 1            |
| 44     | 1              | 21.01.2015   | Shoot     | number of tillers | number                                    | 1            |
| 44     | 1              | 28.01.2015   | Shoot     | absolute length   | cm                                        | 15           |
| 44     | 1              | 28.01.2015   | Shoot     | drought score     | gr and tillering reduced, most l discolor | 11           |
| 44     | 1              | 28.01.2015   | Shoot     | number of tillers | number                                    | 2            |
| 44     | 1              | 04.02.2015   | Shoot     | absolute length   | cm                                        | 16           |
| 44     | 1              | 04.02.2015   | Shoot     | drought score     | plant dead or dying                       | 1            |
| 44     | 1              | 04.02.2015   | Shoot     | number of tillers | number                                    | 2            |

**Table A2: CSV format, classical spreadsheet format**

| Object | Measuredate | Treatment  | Plant_Species | Plant_Subspecies | Design_Row | Design_Column | Location     | Shoot_Absolute_length_cm | Drought score                             | Shoot_Number_of_tillers |
|--------|-------------|------------|---------------|------------------|------------|---------------|--------------|--------------------------|-------------------------------------------|-------------------------|
| 44     | 02.01.2015  | Sowing     | Os            | IR64             |            |               |              |                          |                                           |                         |
| 44     | 14.01.2015  | Planting   | Os            | IR64             | 3          | 1             | Phytotron 44 |                          |                                           |                         |
| 44     | 21.01.2015  | 50 mM NaCl | Os            | IR64             | 3          | 1             | Phytotron 44 | 10                       | no symptoms                               | 1                       |
| 44     | 28.01.2015  |            | Os            | IR64             | 3          | 1             | Phytotron 44 | 15                       | gr and tillering reduced, most l discolor | 2                       |
| 44     | 04.02.2015  |            | Os            | IR64             | 3          | 1             | Phytotron 44 | 16                       | plant dead or dying                       | 2                       |

**Table A3: XML format**

```
<?xml version="1.0" encoding="UTF-16" standalone="yes"?>
<TESTPROGRAM ID="39" VERSION="2012-06-12" NAME="OS_salt_stress" OBJECT="plant" OBJECT_TYPE="7"
DESCRIPTION="Rice under salt stress" xmlns="http://tempuri.org/ResultFile.xsd">
<TEST_OBJECT ID="44" TIMESTAMP="2015-01-02T13:33:51" MULTIPLICATION="1">
<PARAMETER ID="366" NAME_E="Treatment" NAME_D="Behandlung">
<ATTRIBUTE ID="211" NAME_E="Sowing" NAME_D="Aussaat" ORDER_NUMBER="0">
<VALUE NAME_E="" NAME_D=""></VALUE>
</ATTRIBUTE>
```

```

</PARAMETER>
  <PARAMETER ID="345" NAME_E="Plant" NAME_D="Pflanze">
    <ATTRIBUTE ID="145" NAME_E="Species" NAME_D="Art" ORDER_NUMBER="0">
      <VALUE NAME_E="Os" NAME_D="Os">1</VALUE>
    </ATTRIBUTE>
    <ATTRIBUTE ID="146" NAME_E="Subspecies" NAME_D="Unterart" ORDER_NUMBER="0">
      <VALUE NAME_E="IR64" NAME_D="IR64">1</VALUE>
    </ATTRIBUTE>
  </PARAMETER>
</TEST_OBJECT>
<TEST_OBJECT ID="44" TIMESTAMP="2015-01-14T10:45:22" MULTIPLICATION="1">
  <PARAMETER ID="457" NAME_E="Design" NAME_D="Design">
    <ATTRIBUTE ID="98" NAME_E="Column" NAME_D="Spalte" ORDER_NUMBER="0">
      <VALUE NAME_E="" NAME_D="">1</VALUE>
    </ATTRIBUTE>
    <ATTRIBUTE ID="99" NAME_E="Row" NAME_D="Zeile" ORDER_NUMBER="0">
      <VALUE NAME_E="" NAME_D="">3</VALUE>
    </ATTRIBUTE>
  </PARAMETER>
    <PARAMETER ID="366" NAME_E="Treatment" NAME_D="Behandlung">
      <ATTRIBUTE ID="200" NAME_E="Planting" NAME_D="Pflanzen" ORDER_NUMBER="0">
        <VALUE NAME_E="" NAME_D=""></VALUE>
      </ATTRIBUTE>
      <ATTRIBUTE ID="110" NAME_E="Location" NAME_D="Ort" ORDER_NUMBER="0">
        <VALUE NAME_E="Name" NAME_D="Name">Phytotron 44</VALUE>
      </ATTRIBUTE>
    </PARAMETER>
  </TEST_OBJECT>
<TEST_OBJECT ID="44" TIMESTAMP="2015-01-21T12:30:46" MULTIPLICATION="1">
  <PARAMETER ID="366" NAME_E="Treatment" NAME_D="Behandlung">
    <ATTRIBUTE ID="36" NAME_E="treatment" NAME_D="Behandlung" ORDER_NUMBER="0">
      <VALUE NAME_E="50 mM NaCl" NAME_D="50 mM NaCl">1</VALUE>
    </ATTRIBUTE>
  </PARAMETER>
    <PARAMETER ID="120" NAME_E="Shoot" NAME_D="Spross">
      <ATTRIBUTE ID="150" NAME_E="absolute length" NAME_D="absolute Länge" ORDER_NUMBER="0">
        <VALUE NAME_E="cm" NAME_D="cm">10</VALUE>
      </ATTRIBUTE>
      <ATTRIBUTE ID="165" NAME_E="drought score" NAME_D="Trockenstressindex"
ORDER_NUMBER="0">
        <VALUE NAME_E="no sytoms" NAME_D="keine Anzeichen">1</VALUE>
      </ATTRIBUTE>
      <ATTRIBUTE ID="167" NAME_E="number of tillers" NAME_D="Anzahl der Sprosse"
ORDER_NUMBER="0">
        <VALUE NAME_E="number" NAME_D="Anzahl">1</VALUE>
      </ATTRIBUTE>
    </PARAMETER>
  </TEST_OBJECT>
<TEST_OBJECT ID="44" TIMESTAMP="2015-01-28T9:10:36" MULTIPLICATION="1">
  <PARAMETER ID="120" NAME_E="Shoot" NAME_D="Spross">
    <ATTRIBUTE ID="150" NAME_E="absolute length" NAME_D="absolute Länge" ORDER_NUMBER="0">
      <VALUE NAME_E="cm" NAME_D="cm">15</VALUE>
    </ATTRIBUTE>
    <ATTRIBUTE ID="165" NAME_E="drought score" NAME_D="Trockenstressindex"
ORDER_NUMBER="0">
      <VALUE NAME_E="gr and tillering reduced, most l discolo" NAME_D="Wachstum reduziert, > 50 %
Blaetter verfaerbt">1</VALUE>
    </ATTRIBUTE>
  </PARAMETER>
</TEST_OBJECT>

```

```
</ATTRIBUTE>
  <ATTRIBUTE ID="167" NAME_E="number of tillers" NAME_D="Anzahl der Sprosse"
ORDER_NUMBER="0">
  <VALUE NAME_E="number" NAME_D="Anzahl">2</VALUE>
</ATTRIBUTE>
</PARAMETER>
</TEST_OBJECT>
<TEST_OBJECT ID="44" TIMESTAMP="2015-02-04T14:40:26" MULTIPLICATION="1">
<PARAMETER ID="120" NAME_E="Shoot" NAME_D="Spross">
  <ATTRIBUTE ID="150" NAME_E="absolute length" NAME_D="absolute Länge" ORDER_NUMBER="0">
  <VALUE NAME_E="cm" NAME_D="cm">16</VALUE>
  </ATTRIBUTE>
  <ATTRIBUTE ID="165" NAME_E="drought score" NAME_D="Trockenstressindex"
ORDER_NUMBER="0">
  <VALUE NAME_E="plant dead or dying" NAME_D="Pflanze tot oder sterbend">1</VALUE>
  </ATTRIBUTE>
  <ATTRIBUTE ID="167" NAME_E="number of tillers" NAME_D="Anzahl der Sprosse"
ORDER_NUMBER="0">
  <VALUE NAME_E="number" NAME_D="Anzahl">2</VALUE>
  </ATTRIBUTE>
</PARAMETER>
</TEST_OBJECT>
</TESTPROGRAM>
```
